# Supplementary material for: Ageing, dehulling and cooking of Bambara groundnuts: consequences for mineral retention and in vitro bioaccessibility
Source: Royal Society of Chemistry journal article supplement (doi:10.1039/c9fo01731c), 2020-01-01
Supplement: c9fo01731c2.pdf [file c9fo01731c2.pdf]

Table S1: Measured values (mean  $\pm$  stdev) of certified reference materials BCR-129 and BCR-679.

|           | Certified/Indicated values mg/g |         | Measured values mg/g |                    |
|-----------|---------------------------------|---------|----------------------|--------------------|
|           | BCR-129                         | BCR-679 | BCR-129              | BCR-679            |
| <b>Ca</b> | 6.400                           | 7.768   | 6.50 $\pm$ 0.3       | 8.20 $\pm$ 0.1     |
| <b>Mg</b> | 1.450                           | 1.362   | 1.49 $\pm$ 0.1       | 1.35 $\pm$ 0.03    |
| <b>Fe</b> | 0.114                           | 0.055   | 0.11 $\pm$ 0.01      | 0.045 $\pm$ 0.0001 |
| <b>Zn</b> | 0.0321                          | 0.0797  | 0.324 $\pm$ 0.002    | 0.085 $\pm$ 0.003  |

For BCR-129 (n=6) for BCR-679 n=2.
